# Supplementary material for: The mitochondrial copper chaperone COX11 has an additional role in cellular redox homeostasis
Source: PubMed Central journal article supplement (PMC8682889; doi:10.1371/journal.pone.0261465), 2021-12-17
Supplement: pone.0261465.s002.pdf [file pone.0261465.s002.pdf]

### *AtCOX1<sub>prom</sub>*

CATGTTGTAACAATGTTTTGGGCTTAGA **CTTGTG**TATATAAAAAG **ATGATCAA**ACTTATGGAATGT  
ATATTAGTGAAGTTATTTGTGGAAGATTATTACAGAGAGATCCATCACATAAATGAAATAATTTTCG  
TAATAACATCGGAGATATGGAAATCTTAAATGACAGCAGATTT **GTCCAAAA**TTAGATACATGTAAT  
AA **ACACGT**AAATTTAAGTATGAAATGACAATATTCTTGTATACTCTAATTTTCATTTGGGCTTTA  
TTGGGCCAAA **TAATATGG**GCTTACAATTAATAAATTGACTGAACGGATGTGAATAATTTTT **TTTTG**  
**AAA**GAACCGATTGATCTATCTTTATTCTTACCAGACCACAAAGACAAGTCGTTG **TTTACTTGTG**  
**ACT**TTTTTTTTAATC **CACAAG**TTTTTTTTTTTTTTGTTGCGTCAGATTTTTTTGTTT **CCAGTGAC**  
GTCTTTGATCTCCCTCCC **GCCGAC****GACACAAG**CACGCCGTCTGGTTACCTGTAAGTCTTCTATT  
CTCTCTTTCCCTTT **CGCGT**GCTTCCTCTTTGATAGTTACATTCTTTAATCGATCATGGCATCGTT  
CTTGGCCTCTGATTTCGATTACGCTCGGGTATTTTTTTTTTTCCCCGATTATTGATCTCGCCGG  
AGTTTGCAGGAAAGGGAG **AAATTGGG**TT **TCAAATT**TC **GAAATT**TCAAGTAATGTAATCTGGGTTCT  
GTGTTTATTGTGCAGATAAGTGTGTTTGTGTGGTGTCTGTGTCTCACTGTGTGCATAGATTAATAAAT  
AATTTCTCTTCGGCC **ATG...**

### *AtHCC1<sub>prom</sub>*

TG **AGTCAA**CTGGGTCTTCATGAAAAGAGTTGGAAC TAAGTATAGTAA **TGTTAAA**CTGGGGGTG  
GAAAGCAT **AAAT**ACTGAACGGCAAGGTGTTTGTATAAAGGGCGTTCCGAAACCTTGCCGTTTTAA  
TATAACTGTG **ATCT**AAAACAATTGATTGAAACGGCTTAATGGGCTTT **AAATATCT**AAAAC TAAT  
GAGCTTGTGACCCAAACGGGCTTTAAAAATAATTTATCAAATAAACAGAGAAGAAGAACCAAATT  
CACTAGAAGGTTTTATAAAGTGTA AACCTCTTGCACCTCTCAGATTA AAAACCTCAGCTCGCAG  
GAAAGAAATCAGCGAATTTGTGAACTTCAGAGAAAA **ATTGGTC**GTCA **ATG...**

### *AtHCC2<sub>prom</sub>*

CGGAATAACGGCGAGAAGGAAATGTGTGGTGGTGGAGGGAGTGTCGAGAGAGAAGAGAAGAGA  
GACA **ACGCG**GAAATCAGGGTTTTTGCATGGAGTGGCAG **CAAGTGGC**TGTGGTTGATTTGCGTAA  
CTTCAGTTGGTCTCTTTCGACCGGAATTTCTTTTGTACCAACTCAAATGTTTTTTCTTCTTTT  
CATGTCCCTCATTATTAGTATCAATTTTTTTCTTTCTCATTTCCTAT **TTTGATCA**ATATAATTGTAA  
ATTTTATATAGTCGCAAGTGAGGACTAAAATGATGGT **TTTACT**AGGAACGATGGATAAATCACAC  
TACTACCCAAACAAGAAAACATAATCTCATTGCAGATTTTTCGACAAAAATACTCAAATTGTTG  
AATTAAGCCCAATAAAAACCTCAAATTGTTGTATATAAAGCTCAATAATTTTTTTGTGTGCAATTATG  
AAGCCCAATAATTTATTAGTAAGTCAACCCATAGATAATTTAATTACTTTACACAAAATTAACAAA  
TAAAAACATTA AAA **CACACG**GAAATGAGCTTGGCCACCAAGAAAAAACA **AAAACCTT**TTTTATTT  
TG **TTTTGGT**TTGGCTCTTCACCAAGAAAAAAGATTCTATAGTACGGAATAAGTTTTCTTTGGAT  
GAAACTGAAATAATTTATCAAATAAACAGAGAAGAAGAACCAAATTC **ATG...**

## **S1 Fig. Cis-acting putative ROS-response elements in the putative promoter regions of *AtCOX11*, *AtHCC1*, and *AtHCC2*.**

Based on overrepresentation in promoter regions of genes induced by singlet oxygen or other types of ROS, certain DNA sequences were published as ROS-responsive elements (ROSE). We found such ROSE in the promoter (prom) regions of *AtCOX11*, *AtHCC1* and *AtHCC2*. Sequences in yellow were described by [Wang et al., 2013]. Superoxide- (in blue) and general ROS- (in green) specific motifs were identified by [Petrov et al., 2012]. Some motifs match more than one consensus sequence. Start codons are labelled with red letters. The 5' untranslated regions (5' UTR) are labelled in grey.
