# Supplementary material for: The mitochondrial copper chaperone COX11 has an additional role in cellular redox homeostasis
Source: PubMed Central journal article supplement (PMC8682889; doi:10.1371/journal.pone.0261465), 2021-12-17
Supplement: pone.0261465.s003.pdf [file pone.0261465.s003.pdf]

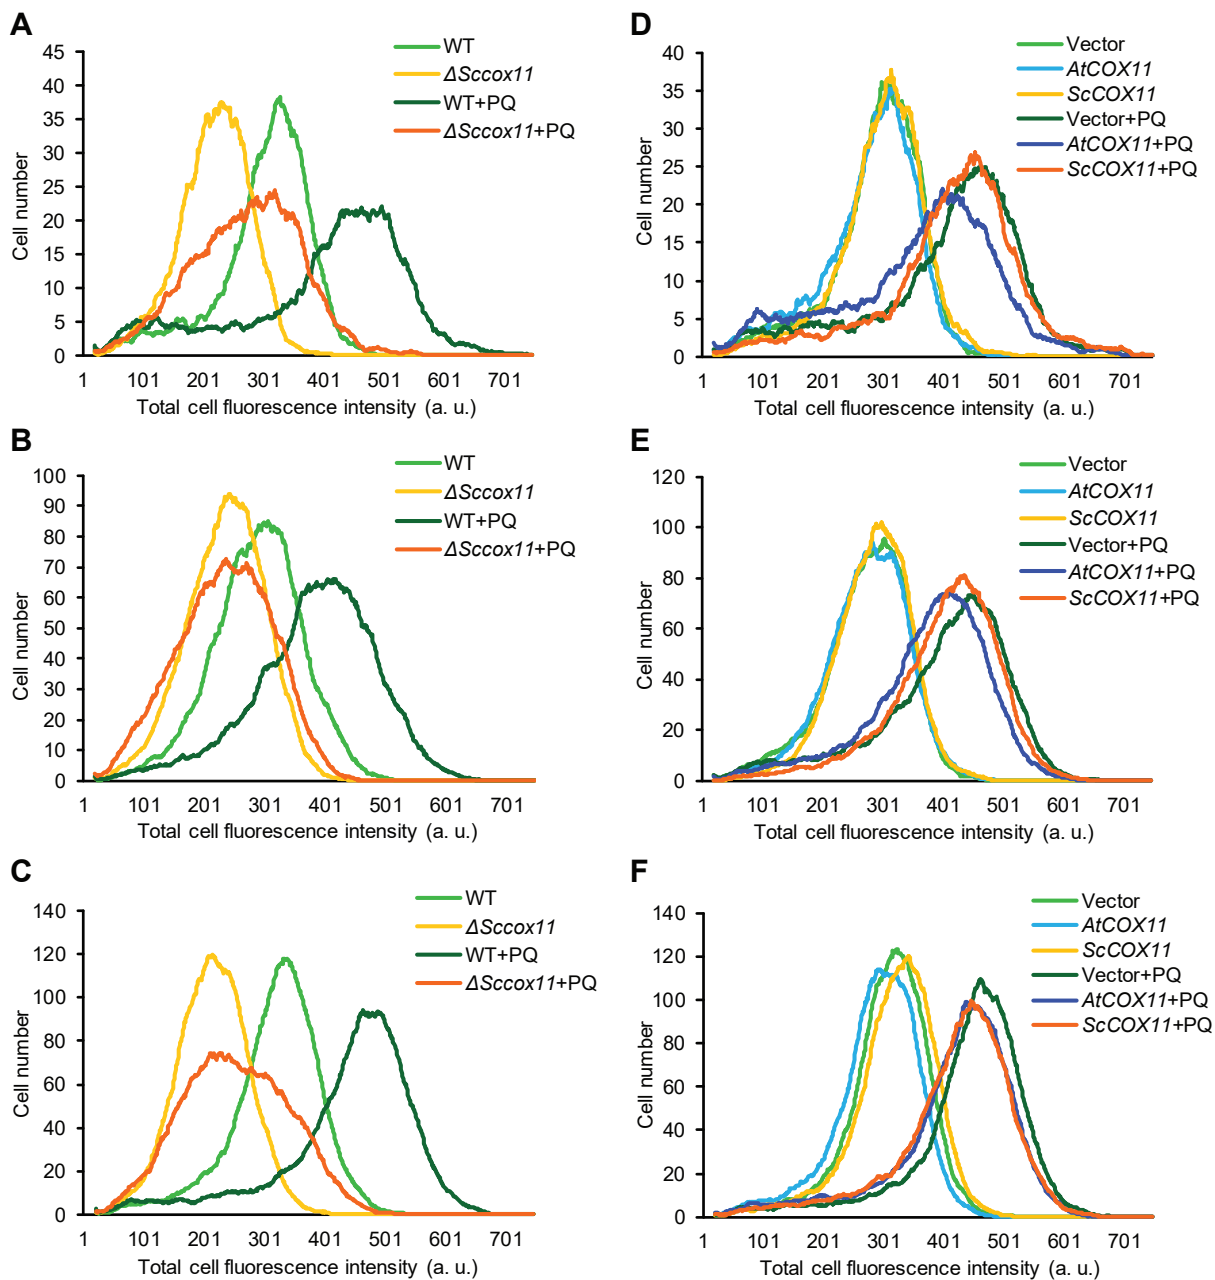

**S2 Fig. Total cell fluorescence intensity distributions of *ScCOX11* knock-out (A, B, C) and overexpressing yeast (D, E, F) cells stained with DCFDA.**

WT,  $\Delta Sccox11$  and *AtCOX11* or *ScCOX11* overexpressing yeast cells were either mock treated or treated with 2 mM paraquat (PQ) and stained with DCFDA to determine the cellular ROS levels. Total fluorescence of individual cells was measured by flow cytometry. Descriptive statistics for the cytometry datasets is given in **S1 Table**. (A,D)(B,E)(C,F) Data derived from three independent experiments. To reduce noise, a moving average (of 10 a. u.) was used to generate graphs which are, for clarity, depicted as lines. Vector = WT strain transformed with the empty vector used for overexpression. a. u. = arbitrary unit.
