# Supplementary material for: The mitochondrial copper chaperone COX11 has an additional role in cellular redox homeostasis
Source: PubMed Central journal article supplement (PMC8682889; doi:10.1371/journal.pone.0261465), 2021-12-17
Supplement: pone.0261465.s004.pdf [file pone.0261465.s004.pdf]

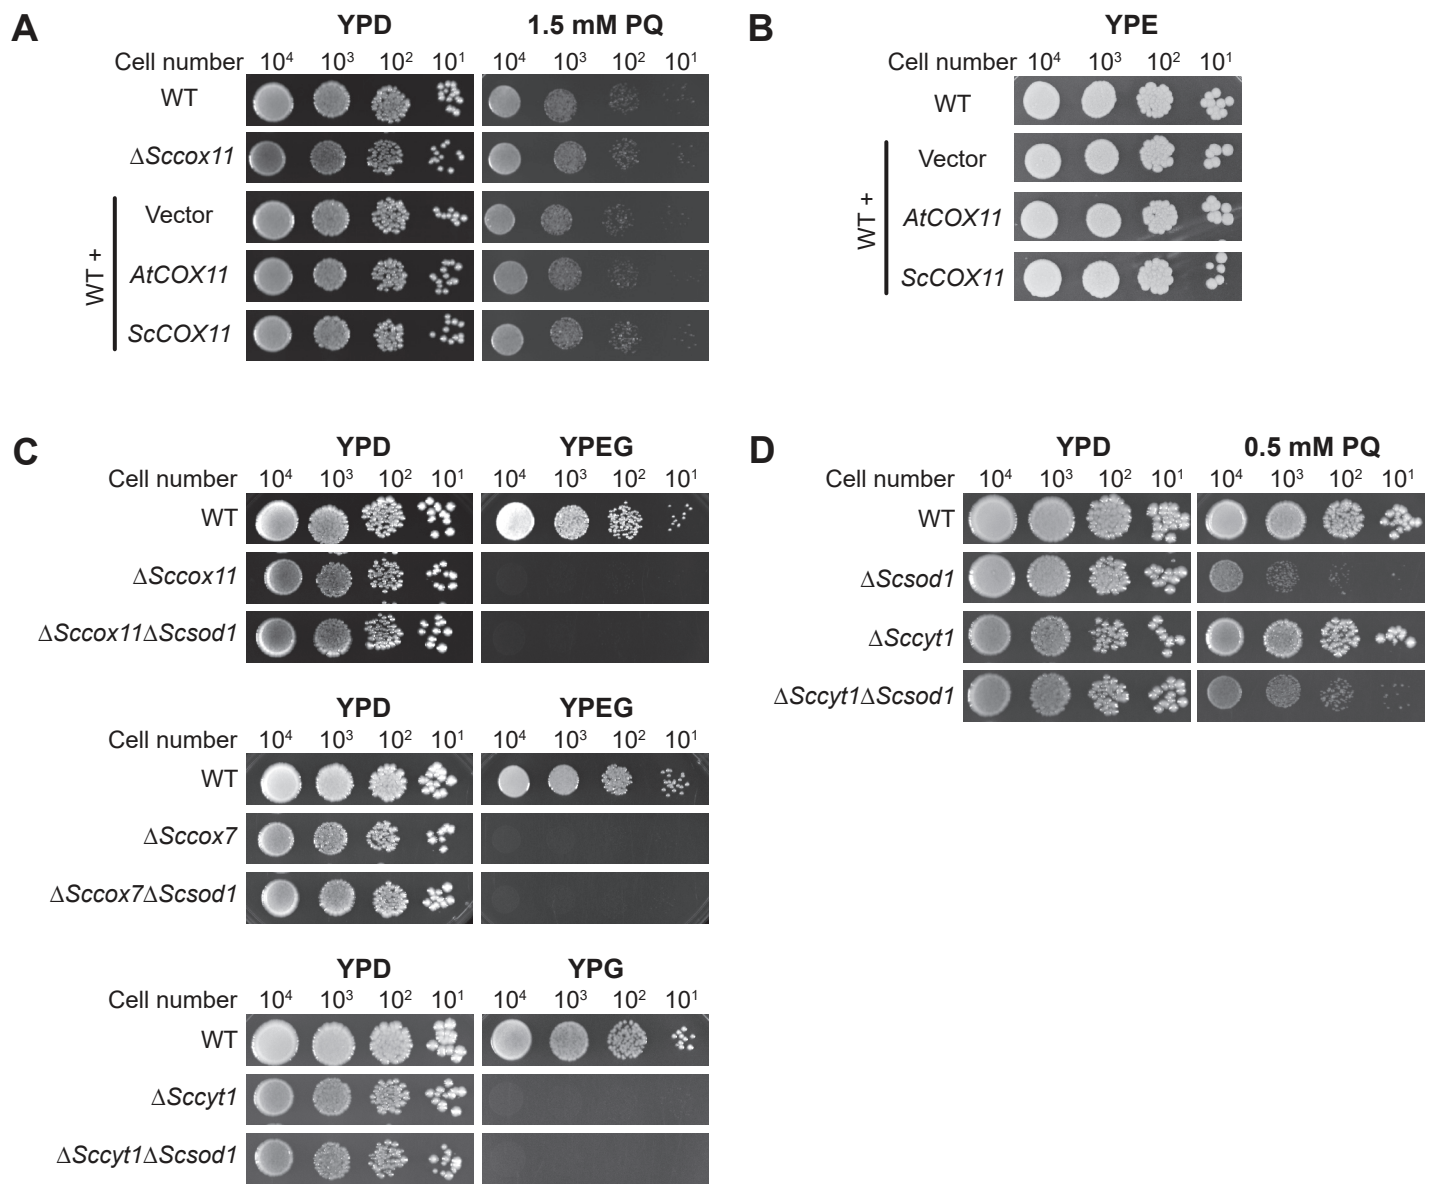

**S3 Fig. Extended data for Figure 3.**

**(A)** The growth of yeast  $\Delta Sccox11$  and *COX11* overexpressing strains in the presence or absence of paraquat (PQ). **(B)** The growth of *COX11* overexpressing yeast strains on respiratory YPE (ethanol media). **(C)** Test of respiratory competence of yeast single and double mutants. YPD, media with glucose; YPG, media with glycerol; YPEG, media with ethanol and glycerol. **(D)** The growth of  $\Delta Sccyt1$  mutants in the presence or absence of PQ. (A-D) Serial dilutions of indicated yeast strains were spotted in the appropriate media and cultured for 48-72 h.
