# Supplementary material for: The mitochondrial copper chaperone COX11 has an additional role in cellular redox homeostasis
Source: PubMed Central journal article supplement (PMC8682889; doi:10.1371/journal.pone.0261465), 2021-12-17
Supplement: pone.0261465.s007.pdf [file pone.0261465.s007.pdf]

---

**S2 Table.** Gene regulation in response to 50  $\mu$ M antimycin A (microarray data from Ng et al. [2013], Genevestigator).

---

| Gene name   | <i>AtCOX11</i> | <i>AtHCC1</i> | <i>AtHCC2</i> | <i>AtCOX5b-1</i> | <i>AtCRK21</i> | <i>AtAOX1a</i> |
|-------------|----------------|---------------|---------------|------------------|----------------|----------------|
| Fold change | +2.23          | +1.03         | +1.60         | -2.14            | -1.25          | +9.51          |

---

Arabidopsis plants were treated for 3 h with either mock treatment or with 50  $\mu$ M antimycin A. GEO repository number: GSE36011.

---
