# Supplementary material for: The mitochondrial copper chaperone COX11 has an additional role in cellular redox homeostasis
Source: PubMed Central journal article supplement (PMC8682889; doi:10.1371/journal.pone.0261465), 2021-12-17
Supplement: pone.0261465.s008.pdf [file pone.0261465.s008.pdf]

**S3 Table. Cloning primers**

| #  | Name                          | Sequence (5' → 3')                                    |
|----|-------------------------------|-------------------------------------------------------|
| 1  | tAtCOX11 F                    | GGGGACAAGTTTGTACAAAAAAGCAGGCTACCATGTACGCTGCTGTGCCATTG |
| 2  | tScCOX11 F                    | GGGGACAAGTTTGTACAAAAAAGCAGGCTACCATGTATGCAGCGGTACCACTC |
| 3  | tAtCOX11<br>C119A F           | TACGCTGCTGTGCCATTGTATAGAACATTCGCCCAAGC                |
| 4  | tScCOX11<br>C111A F           | TATGCAGCGGTACCACTCTATAGAGCCATTGCTGCTCG                |
| 5  | AtCox11 R                     | GGGGACCACTTTGTACAAGAAAGCTGGGTTTAATTGGTTTCTTGAAGTGG    |
| 6  | ScCox11 R                     | GGGGACCACTTTGTACAAGAAAGCTGGGTTTAATTTGAGTTGTCTTTCC     |
| 7  | tAtCOX11<br>C221A OL-F        | CAACAAGATACAATGTTTTGCCTTTGAGGAGCAGCGACTC              |
| 8  | tAtCOX11<br>C221A OL-R        | GAGTCGCTGCTCCTCAAAGGCAAACATTGTATCTTGTG                |
| 9  | tScCOX11<br>C210A OL-F        | CCAATGTTTTGCCTTTGAAGAACAAAAGCTAGCTGCC                 |
| 10 | tScCOX11<br>C210A OL-R        | GGCAGCTAGCTTTTGTCTTCAAAGGCAAACATTGG                   |
| 11 | tAtCOX11<br>TOPO F            | CACCATGTACGCTGCTGTGCCATTG                             |
| 12 | tAtCOX11<br>TOPO R            | TTAATTGGTTTCTTGAAGTGAAC                               |
| 13 | tScCOX11<br>TOPO F            | CACCATGTATGCAGCGGTACCACTC                             |
| 14 | tScCOX11<br>TOPO R            | TTAATTTGAGTTGTCTTTCCTTGTG                             |
| 15 | tAtCOX11<br>C219A OL-F        | CAAGATACAAGCTTTTTGCTTTG                               |
| 16 | tAtCOX11<br>C219A OL-R        | CAAAGCAAAAAGCTTGTATCTTG                               |
| 17 | tScCOX11<br>C208A OL-F        | TAAAATCCAAGCTTTTTGCTTTG                               |
| 18 | tScCOX11<br>C208A OL-R        | CAAAGCAAAAAGCTTGGATTTTA                               |
| 19 | tAtCOX11<br>$\Delta$ cys OL-F | CAAGATACAAGCTTTTGCCTTTGAGGAGC                         |
| 20 | tAtCOX11<br>$\Delta$ cys OL-R | GCTCCTCAAAGGCAAAGCTTGTATCTTG                          |
| 21 | tScCOX11<br>$\Delta$ cys OL-F | AATAAAATCCAAGCTTTTGCCTTTGAAGAAC                       |
| 22 | tScCOX11<br>$\Delta$ cys OL-R | GTTCTTCAAAGGCAAAGCTTGGATTTTATT                        |
| 23 | GFP-F                         | GGGGACAAGTTTGTACAAAAAAGCAGGCTACCATGGTGAGCAAGGGCGAGGAG |

- tAtCOX11 was made by PCR with primers #1/5, followed by BP reaction into pDONR221-P1-P2.
  - tScCOX11 was made by PCR with primers #2/6, followed by BP reaction into pDONR221-P1-P2.
  - tAtCOX11 C119A was made by primer extension PCR with primers #1/3/5, followed by BP reaction into pDONR221-P1-P2.
  - tScCOX11 C111A was made by primer extension PCR with primers #2/4/6, followed by BP reaction into pDONR221-P1-P2.
  - tAtCOX11 C221A was made by overlap PCR with primers #1/7/8/5, followed by BP reaction into pDONR221-P1-P2.
  - tScCOX11 C210A was made by overlap PCR with primers #1/9/10/5, followed by BP reaction into pDONR221-P1-P2.
  - tAtCOX11 C219A was made by overlap PCR with primers #11/12/15/16, followed by D-TOPO reaction into pENTR.
  - tScCOX11 C208A was made by overlap PCR with primers #13/14/17/18, followed by D-TOPO reaction into pENTR.
  - tAtCOX11  $\Delta$ cys was made by overlap PCR with primers #11/12/19/20 with tAtCOX11 C119A as template, followed by D-TOPO reaction into pENTR.
  - tScCOX11  $\Delta$ cys was made by overlap PCR with primers #13/14/21/22 with tScCOX11 C111A as template, followed by D-TOPO reaction into pENTR.
  - GFP was made by PCR with primers #23/24 followed by BP reaction into pDONR221-P1-P2.
-
