# Supplementary material for: The mitochondrial copper chaperone COX11 has an additional role in cellular redox homeostasis
Source: PubMed Central journal article supplement (PMC8682889; doi:10.1371/journal.pone.0261465), 2021-12-17
Supplement: pone.0261465.s009.pdf [file pone.0261465.s009.pdf]

**S4 Table. Primers used for qPCR.**

| Locus     | Primer Name                          | Primer Sequence (5' → 3')                              | Conc. each (μM) | Efficiency (%) | Amplicon Size (bp) |      | Comment          | Reference                 |
|-----------|--------------------------------------|--------------------------------------------------------|-----------------|----------------|--------------------|------|------------------|---------------------------|
|           |                                      |                                                        |                 |                | cDNA               | gDNA |                  |                           |
| At1g02410 | <i>COX11</i> F<br><i>COX11</i> R     | GATTGACATGCCGGTCTTCT<br>TGGTTTCTTGAAGTGGAACAGA         | 0.33            | 102.6          | 164                | N/A  | spans exon/exon  | (Radin et al., 2015)      |
| At1g13320 | <i>PP2A</i> F<br><i>PP2A</i> R       | CCTGCGGTAATAACTGCATCT<br>CTTCACTTAGCTCCACCAAGCA        | 0.33            | 95.5           | 142                | 356  | spans 2 introns  | (Czechowski et al., 2005) |
| At3g18780 | <i>ACT2</i> F<br><i>ACT2</i> R       | GGTAACATTGTGCTCAGTGGTGG<br>AACGACCTTAATCTTCATGCTGC     | 0.33            | 100.5          | 108                | 108  | spans no introns | (Czechowski et al., 2005) |
| At3g22370 | <i>AOX1a</i> F<br><i>AOX1a</i> R     | GGAGGCTTCCTGCTGATGCGACA<br>AGCTGGAGCTTCCTTTAGTTCACGACC | 0.16            | 102.7          | 134                | 214  | spans 1 intron   | (Radin et al., 2015)      |
| At3g08950 | <i>HCC1</i> F<br><i>HCC1</i> R       | GGCCCGATCTTACCGGGTTT<br>CAACGCCGTCTGTCAACGAG           | 0.25            | 99.8           | 158                | 391  | spans 1 intron   | (Radin et al., 2015)      |
| At4g23290 | <i>CRK21</i> F<br><i>CRK21</i> R     | TCGTCCAAGCATGTCCACAA<br>CTCTCGGCTAATGGGTTTCGG          | 0.5             | 101.1          | 120                | 120  | spans no introns | This work                 |
| At3g15640 | <i>COX5b-1</i> F<br><i>COX5b-1</i> R | GACAAGCGAATTGTGGGCTG<br>AGTACTGAGTGCAAACCGGG           | 0.25            | 104.3          | 112                | 238  | spans 1 intron   | (Radin et al., 2015)      |
| At4g39740 | <i>HCC2</i> F<br><i>HCC2</i> R       | CGGATGTTGGACCTGAGCA<br>TTGCACTTGCAGTCCCGGTTA           | 0.25            | 97.0           | 189                | 379  | spans 2 introns  | This work                 |

The optimal final primer concentrations (conc.) and primer pair efficiencies were experimentally determined. The amplicon size of the cDNA and of the potential contamination genomic DNA (gDNA) are given. F = forward, R = reverse, N/A = not applicable.

Czechowski T, Stitt M, Altmann T, Udvardi MK, Scheible WRR. Genome-wide identification and testing of superior reference genes for transcript normalization in *Arabidopsis*. *Plant Physiology*. 2005;139: 5-17. doi: 10.1104/pp.105.063743

Radin I, Mansilla N, Rödel G, Steinebrunner I. The Arabidopsis COX11 Homolog is Essential for Cytochrome *c* Oxidase Activity. *Frontier in Plant Science*. 2015;6:1091. doi: 10.3389/fpls.2015.01091
